# Supplementary material for: Carbon nanodot decorated graphitic carbon nitride: new insights into the enhanced photocatalytic water splitting from ab initio studies
Source: Royal Society of Chemistry journal article supplement (doi:10.1039/c5cp05512a), 2015-01-01
Supplement: c5cp05512a1.pdf [file c5cp05512a1.pdf]

## Electronic Supplementary Information (ESI)

### Carbon Nanodot Decorated Graphitic Carbon Nitride: New Insights on the Enhanced Photocatalytic Water Splitting from *ab-initio* Studies

Guoping Gao<sup>1</sup>, Yan Jiao<sup>2</sup>, Fengxian Ma<sup>1</sup>, Yalong Jiao<sup>1</sup>, Eric Wacławik<sup>1</sup>, and Aijun Du<sup>1,\*</sup>

<sup>1</sup>School of Chemistry, Physics and Mechanical Engineering Faculty, Queensland University of  
Technology (QUT), Garden Point Campus, QLD 4001, Brisbane, Australia

<sup>2</sup>School of Chemical Engineering, University of Adelaide, Adelaide, SA 5005, Australia

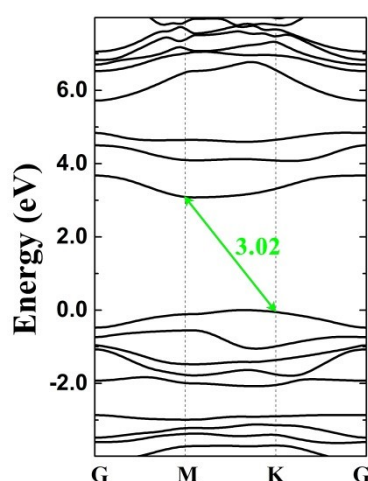

Figure S1 Band structures of *g*-C<sub>3</sub>N<sub>4</sub> calculated by HSE06. The Fermi level was shifted to zero.
